# Supplementary material
Source: publisher site journal article supplement (https://www.spandidos-publications.com/5174/downloadSupplementary)
Supplement: Supplementary file 1 [file downloadSupplementary]

Supplementary Data 1. Video highlighting the physical manifestations of spastin mutation on the mobility of the proband's uncle (II-3). The two women present are medical staff.
